# Supplementary material
Source: ML conference proceedings conference paper supplement (https://openaccess.thecvf.com/content/ICCV2023/html/Xu_Backpropagation_Path_Search_ICCV_2023_paper.html)
Supplement: Supplementary file 87 [file Xu_Backpropagation_Path_Search_ICCV_2023_supplemental.zip]

Archive with 4 entries (4 files):
- pas-appendix.pdf
- __MACOSX/._pas-appendix.pdf
- pas-random-selected-50-ig.zip
- __MACOSX/._pas-random-selected-50-ig.zip
