# Supplementary material
Source: ML conference proceedings conference paper supplement (https://openaccess.thecvf.com/content/ICCV2023/html/Xu_Backpropagation_Path_Search_ICCV_2023_paper.html)

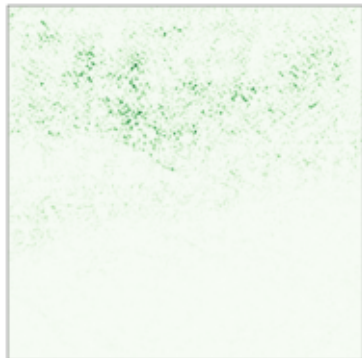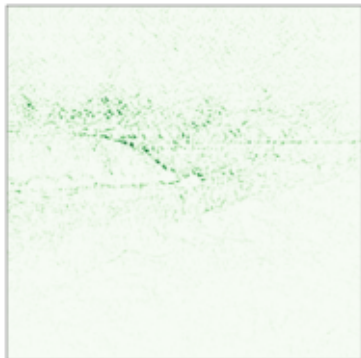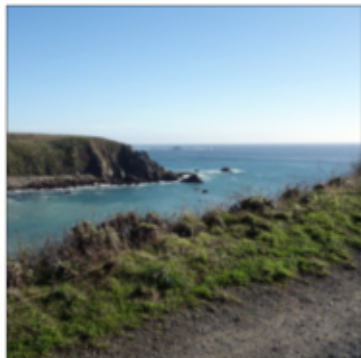

Supplement: Supplementary file 1 [file Xu_Backpropagation_Path_Search_ICCV_2023_supplemental.zip]

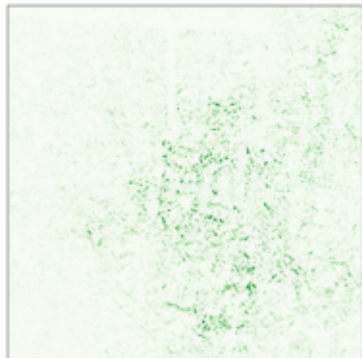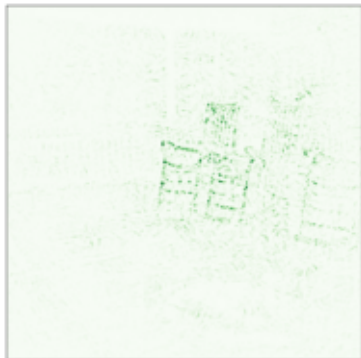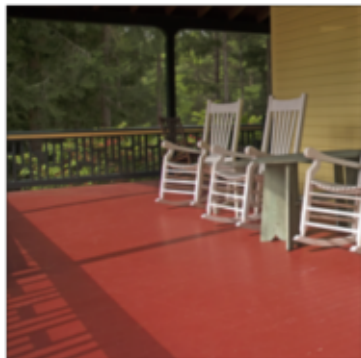

Supplement: Supplementary file 2 [file Xu_Backpropagation_Path_Search_ICCV_2023_supplemental.zip]

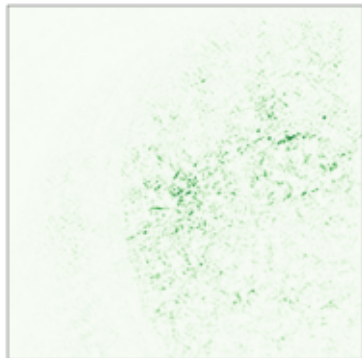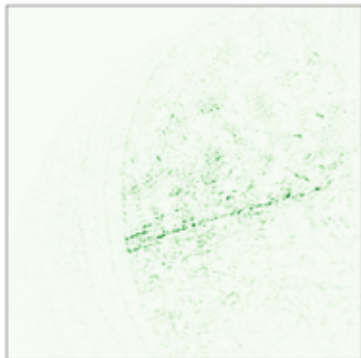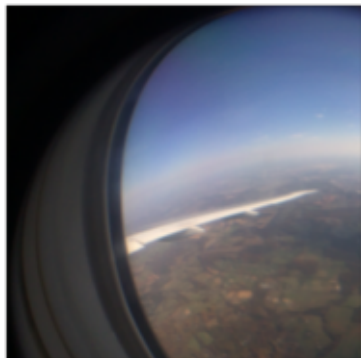

Supplement: Supplementary file 6 [file Xu_Backpropagation_Path_Search_ICCV_2023_supplemental.zip]

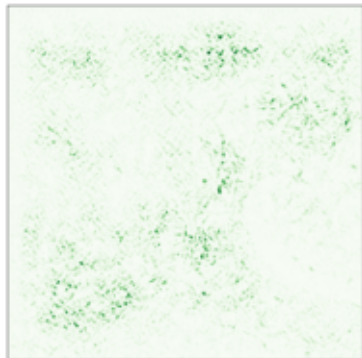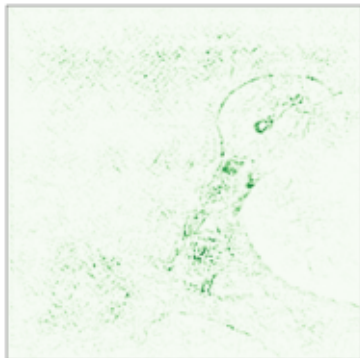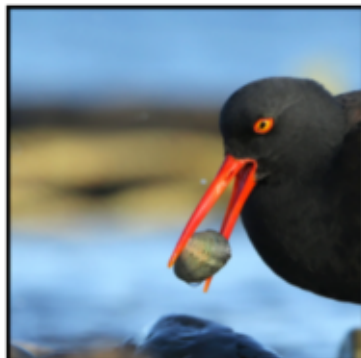

Supplement: Supplementary file 7 [file Xu_Backpropagation_Path_Search_ICCV_2023_supplemental.zip]

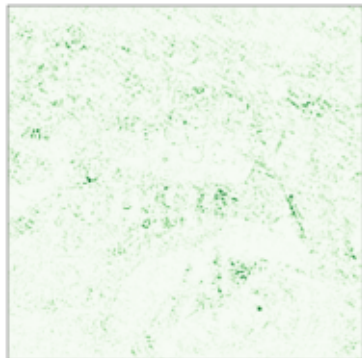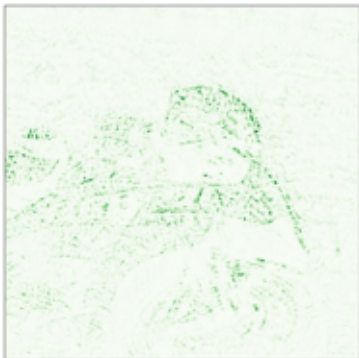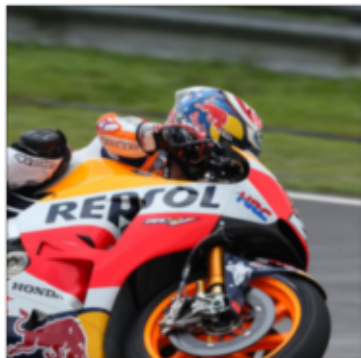

Supplement: Supplementary file 8 [file Xu_Backpropagation_Path_Search_ICCV_2023_supplemental.zip]

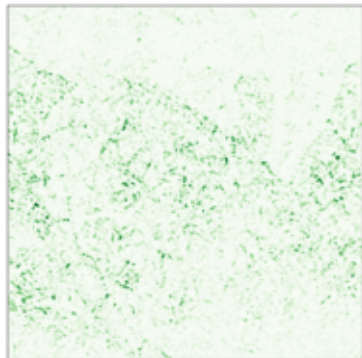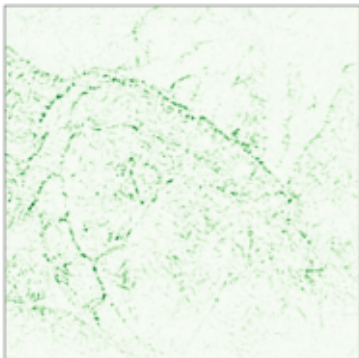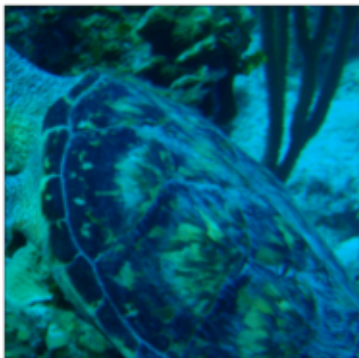

Supplement: Supplementary file 9 [file Xu_Backpropagation_Path_Search_ICCV_2023_supplemental.zip]

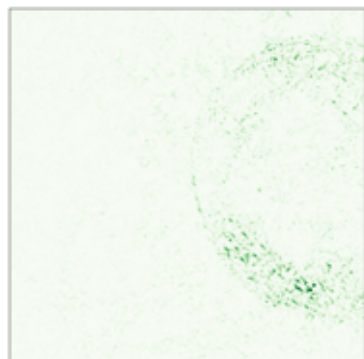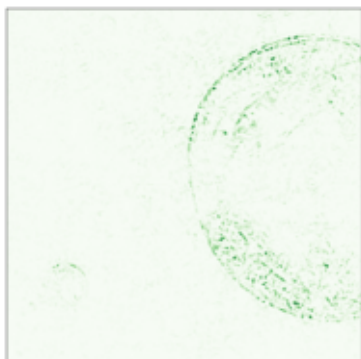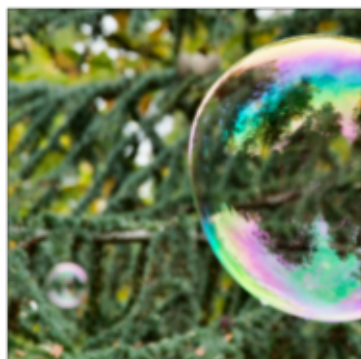

Supplement: Supplementary file 10 [file Xu_Backpropagation_Path_Search_ICCV_2023_supplemental.zip]

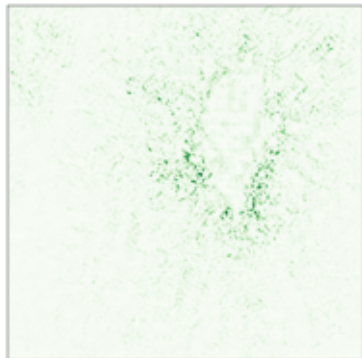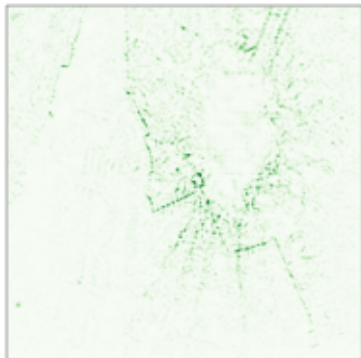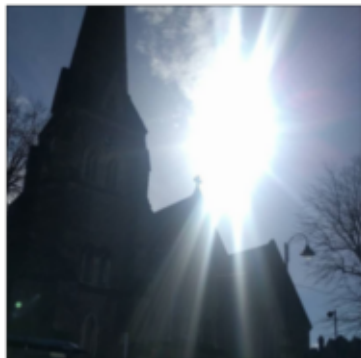

Supplement: Supplementary file 12 [file Xu_Backpropagation_Path_Search_ICCV_2023_supplemental.zip]

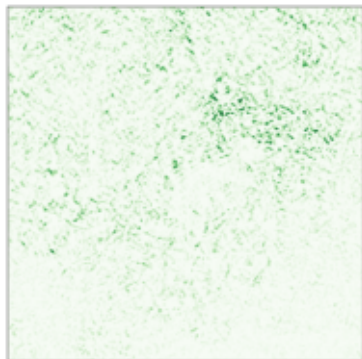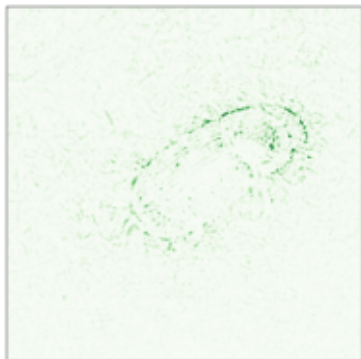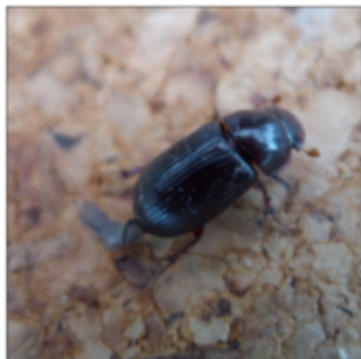

Supplement: Supplementary file 15 [file Xu_Backpropagation_Path_Search_ICCV_2023_supplemental.zip]

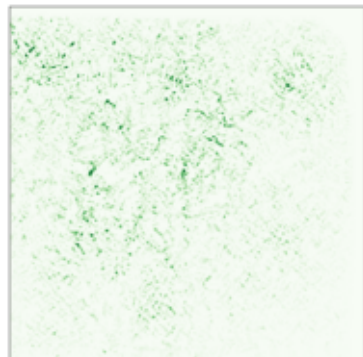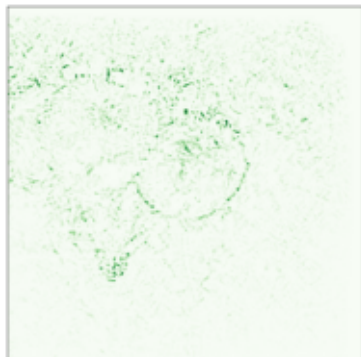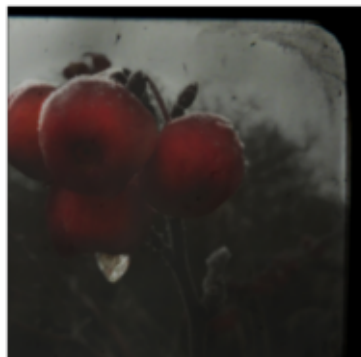

Supplement: Supplementary file 16 [file Xu_Backpropagation_Path_Search_ICCV_2023_supplemental.zip]

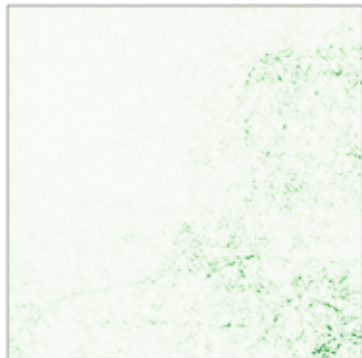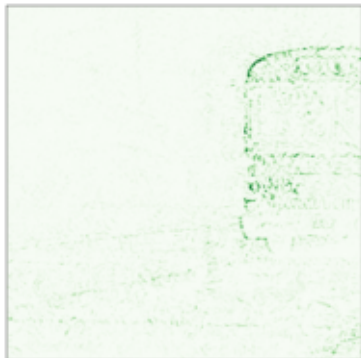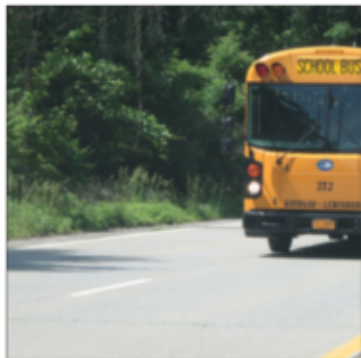

Supplement: Supplementary file 17 [file Xu_Backpropagation_Path_Search_ICCV_2023_supplemental.zip]

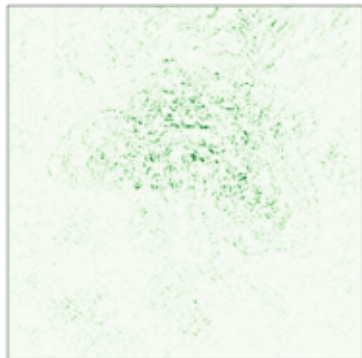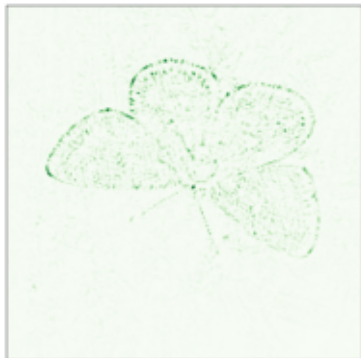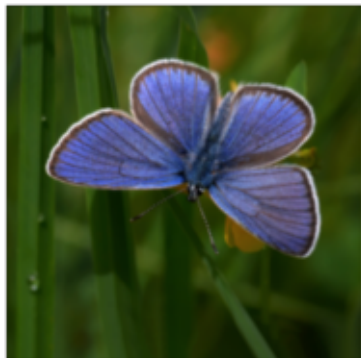

Supplement: Supplementary file 18 [file Xu_Backpropagation_Path_Search_ICCV_2023_supplemental.zip]

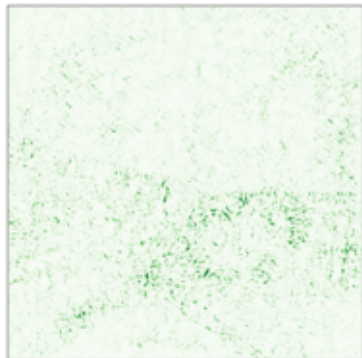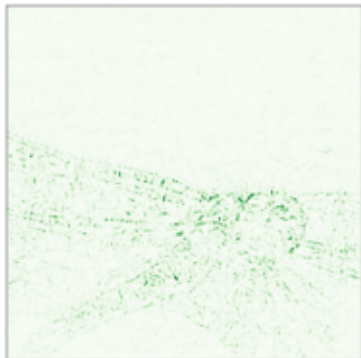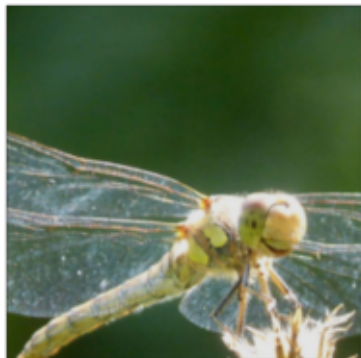

Supplement: Supplementary file 19 [file Xu_Backpropagation_Path_Search_ICCV_2023_supplemental.zip]

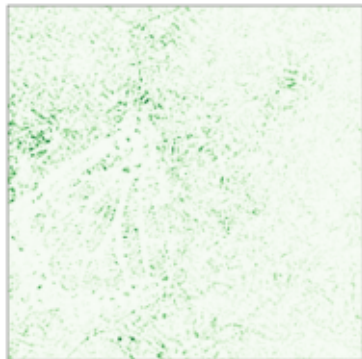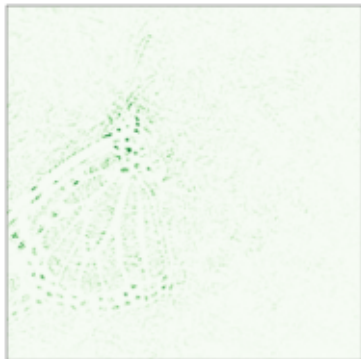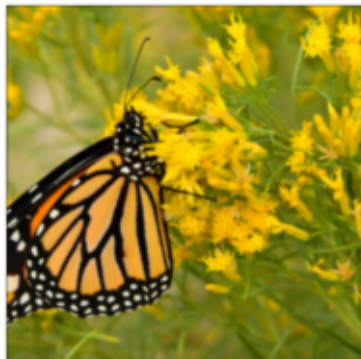

Supplement: Supplementary file 27 [file Xu_Backpropagation_Path_Search_ICCV_2023_supplemental.zip]

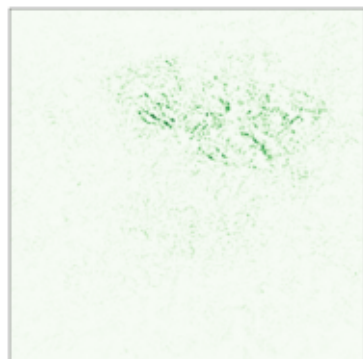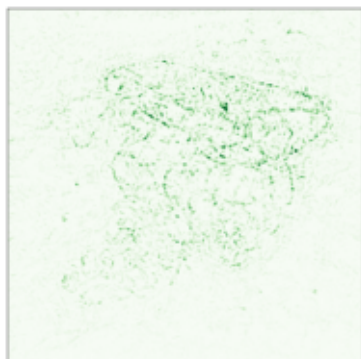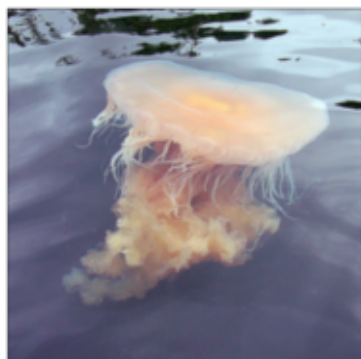

Supplement: Supplementary file 29 [file Xu_Backpropagation_Path_Search_ICCV_2023_supplemental.zip]

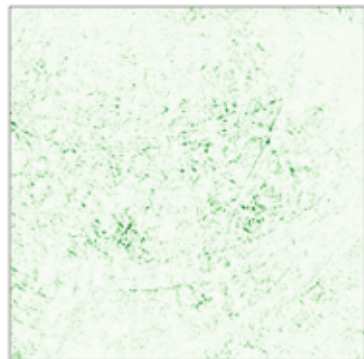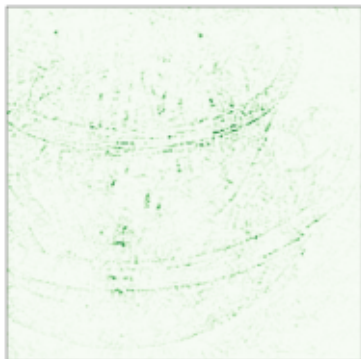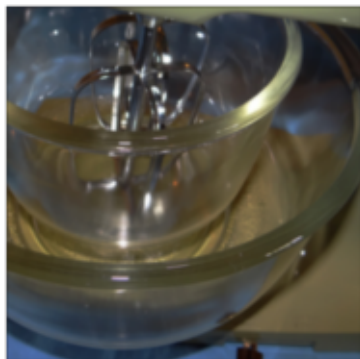

Supplement: Supplementary file 32 [file Xu_Backpropagation_Path_Search_ICCV_2023_supplemental.zip]

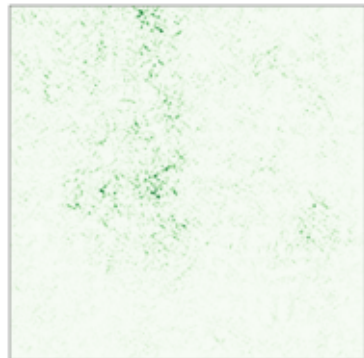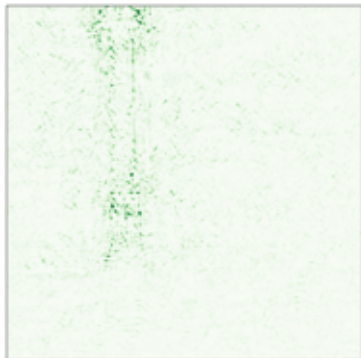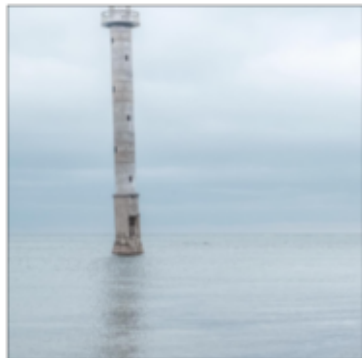

Supplement: Supplementary file 33 [file Xu_Backpropagation_Path_Search_ICCV_2023_supplemental.zip]

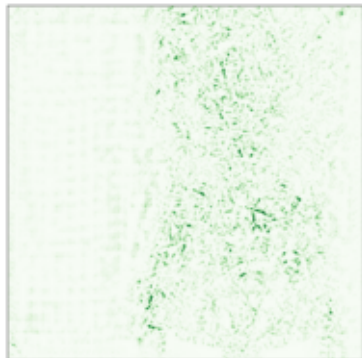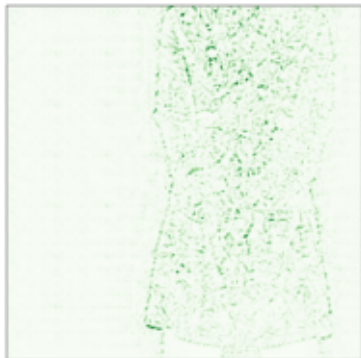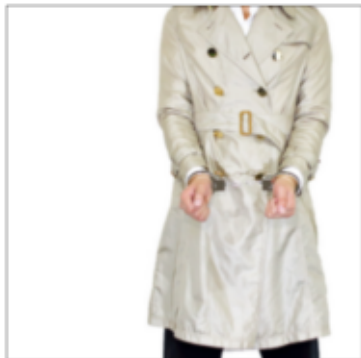

Supplement: Supplementary file 35 [file Xu_Backpropagation_Path_Search_ICCV_2023_supplemental.zip]

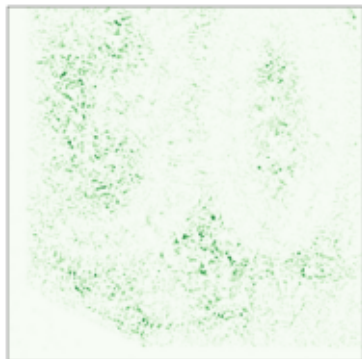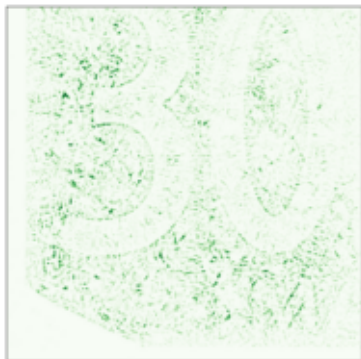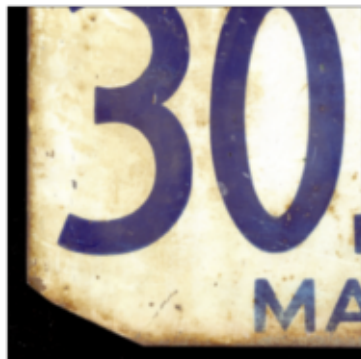

Supplement: Supplementary file 36 [file Xu_Backpropagation_Path_Search_ICCV_2023_supplemental.zip]

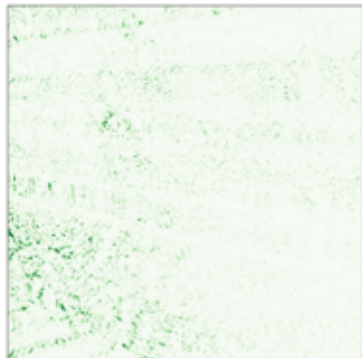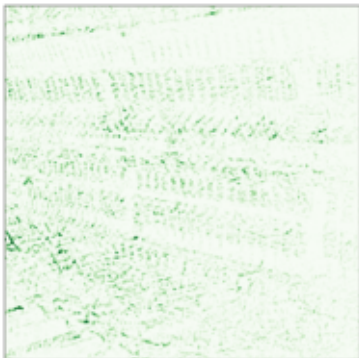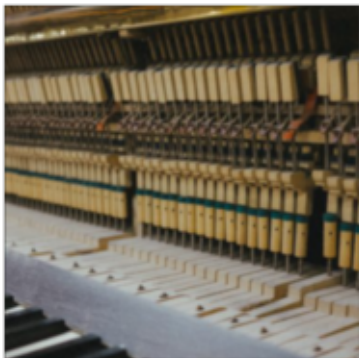

Supplement: Supplementary file 38 [file Xu_Backpropagation_Path_Search_ICCV_2023_supplemental.zip]

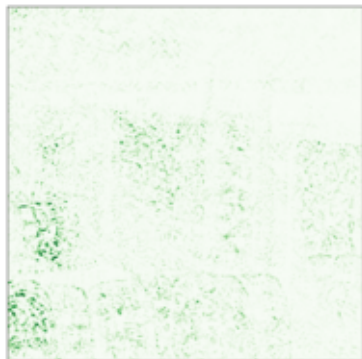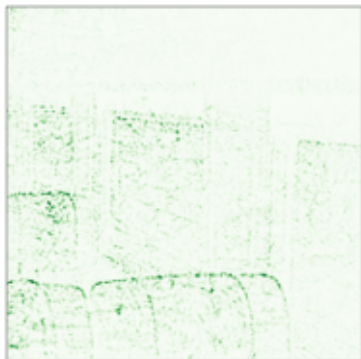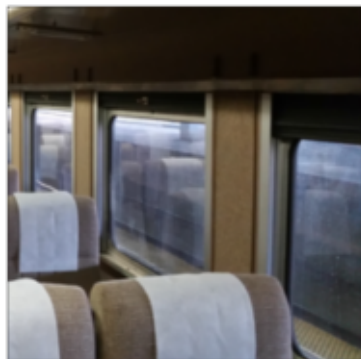

Supplement: Supplementary file 41 [file Xu_Backpropagation_Path_Search_ICCV_2023_supplemental.zip]

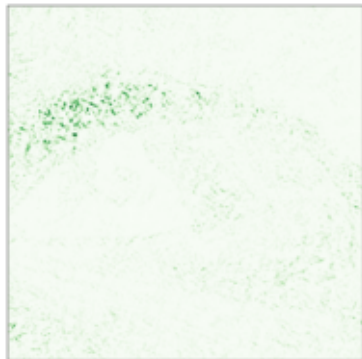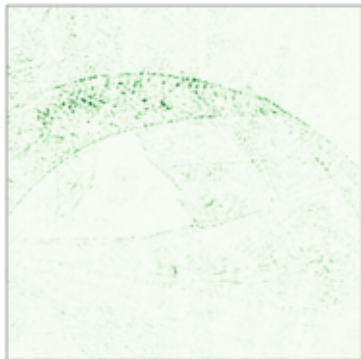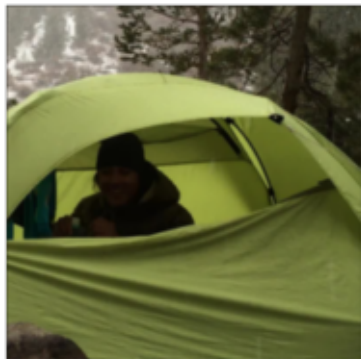

Supplement: Supplementary file 42 [file Xu_Backpropagation_Path_Search_ICCV_2023_supplemental.zip]

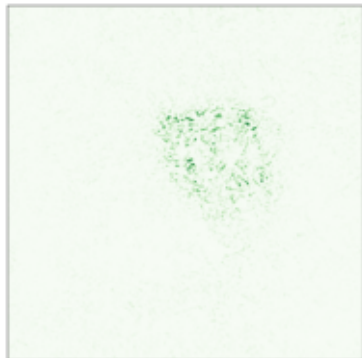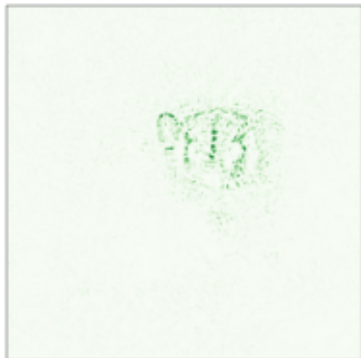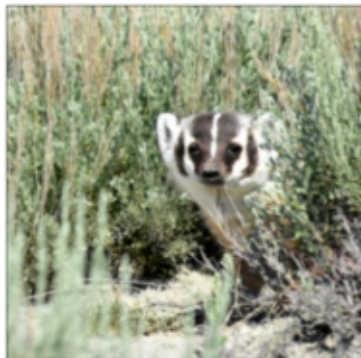

Supplement: Supplementary file 43 [file Xu_Backpropagation_Path_Search_ICCV_2023_supplemental.zip]

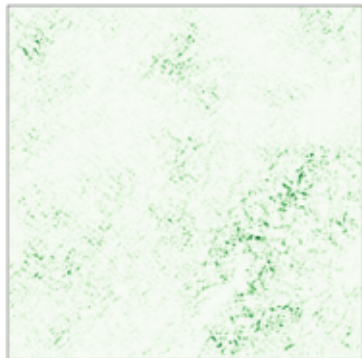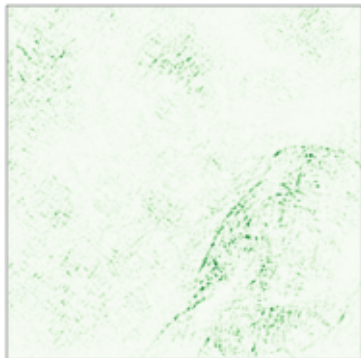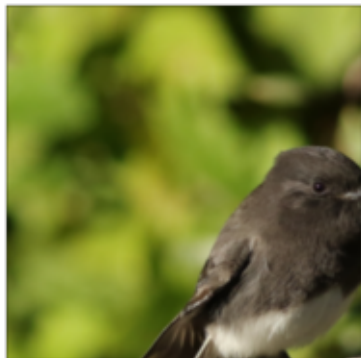

Supplement: Supplementary file 44 [file Xu_Backpropagation_Path_Search_ICCV_2023_supplemental.zip]

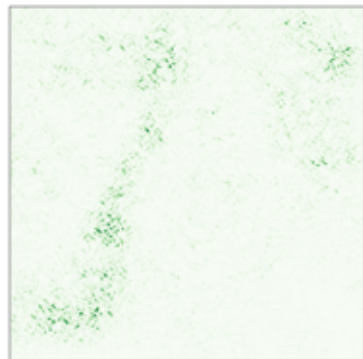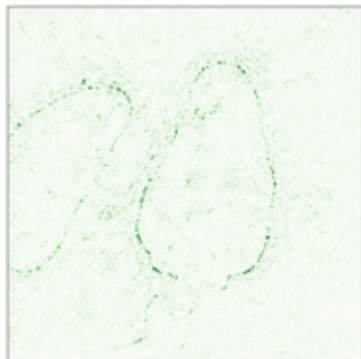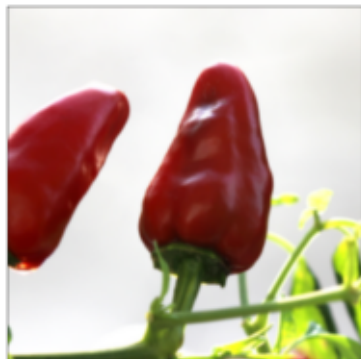

Supplement: Supplementary file 45 [file Xu_Backpropagation_Path_Search_ICCV_2023_supplemental.zip]

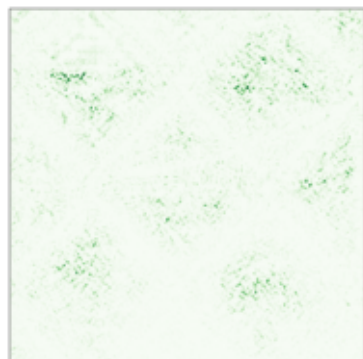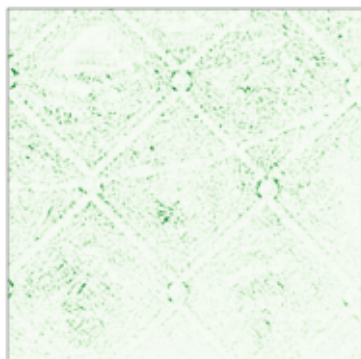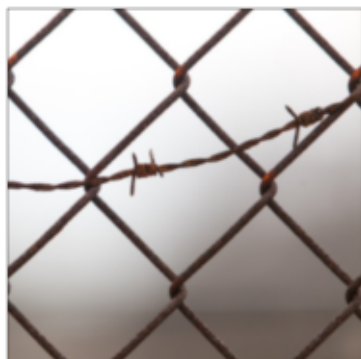

Supplement: Supplementary file 46 [file Xu_Backpropagation_Path_Search_ICCV_2023_supplemental.zip]

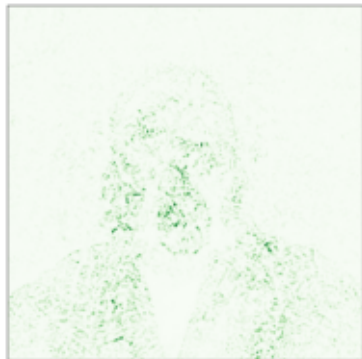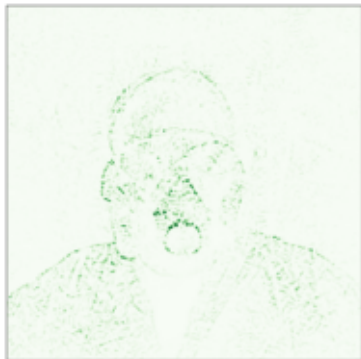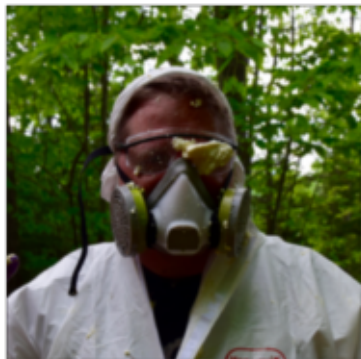

Supplement: Supplementary file 49 [file Xu_Backpropagation_Path_Search_ICCV_2023_supplemental.zip]

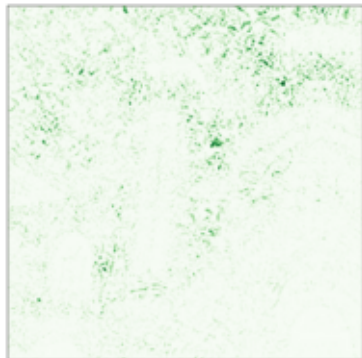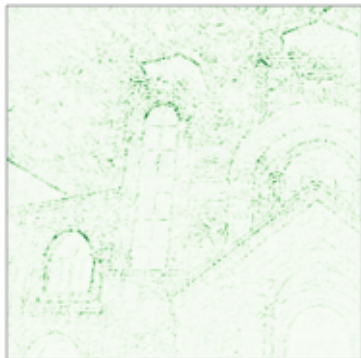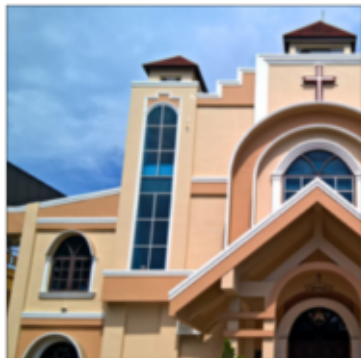

Supplement: Supplementary file 50 [file Xu_Backpropagation_Path_Search_ICCV_2023_supplemental.zip]

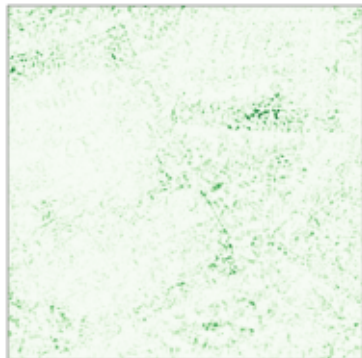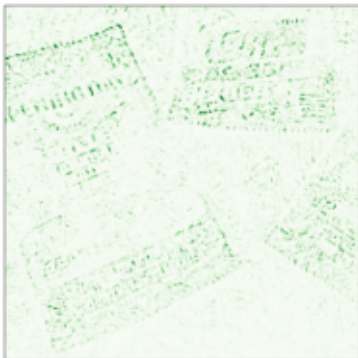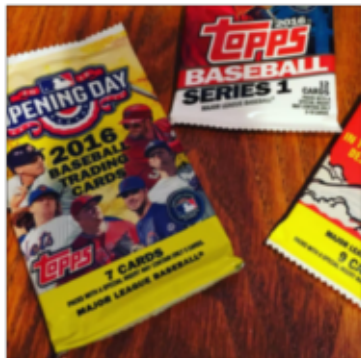

Supplement: Supplementary file 51 [file Xu_Backpropagation_Path_Search_ICCV_2023_supplemental.zip]

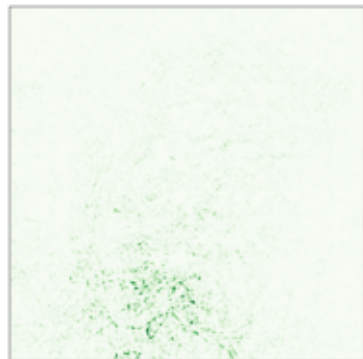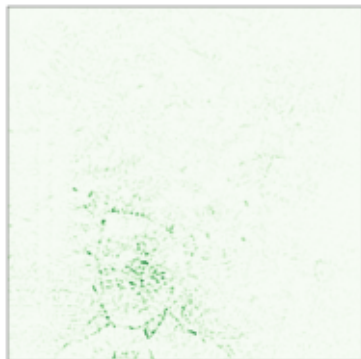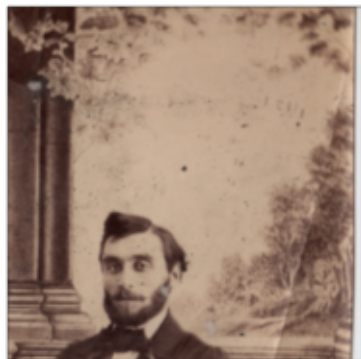

Supplement: Supplementary file 52 [file Xu_Backpropagation_Path_Search_ICCV_2023_supplemental.zip]

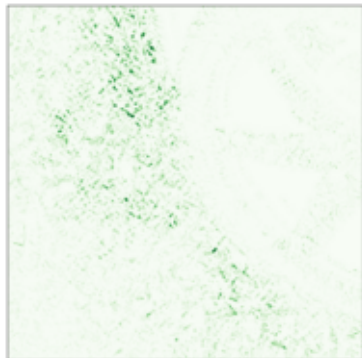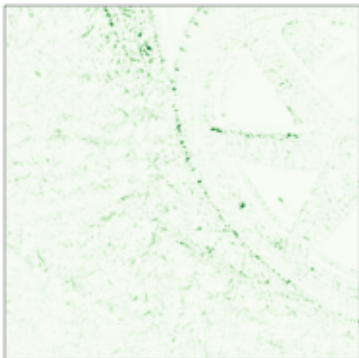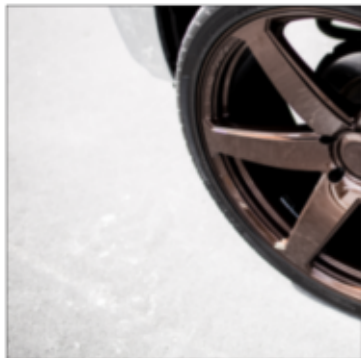

Supplement: Supplementary file 53 [file Xu_Backpropagation_Path_Search_ICCV_2023_supplemental.zip]

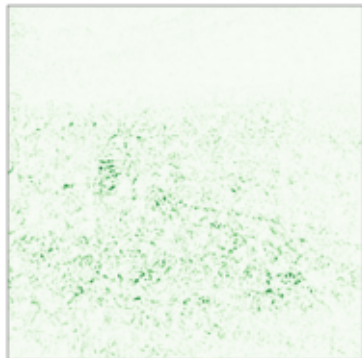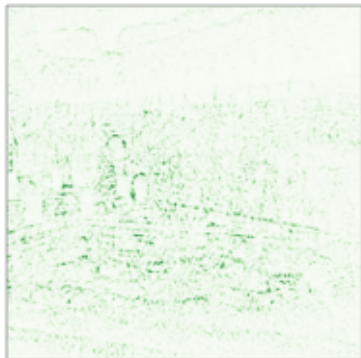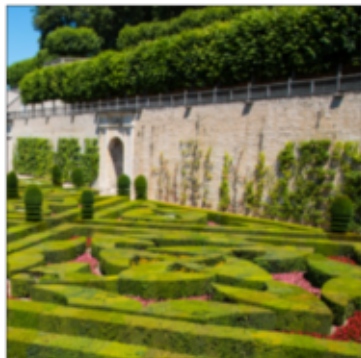

Supplement: Supplementary file 55 [file Xu_Backpropagation_Path_Search_ICCV_2023_supplemental.zip]

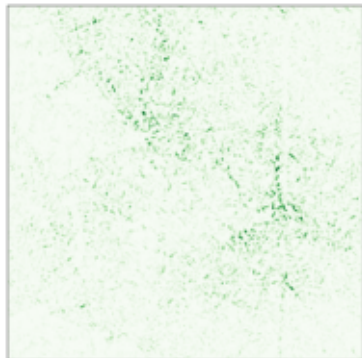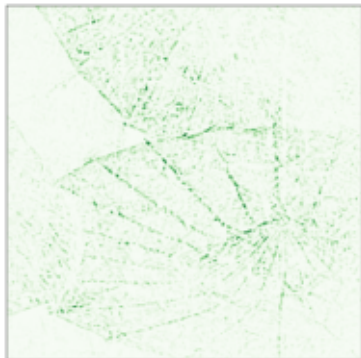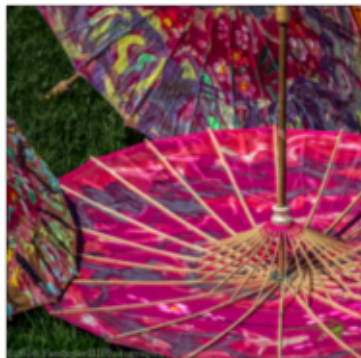

Supplement: Supplementary file 56 [file Xu_Backpropagation_Path_Search_ICCV_2023_supplemental.zip]

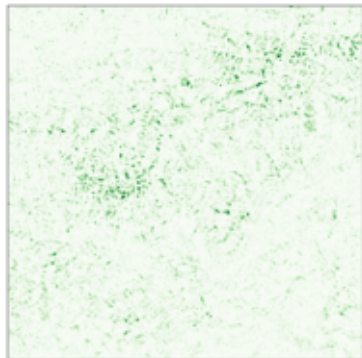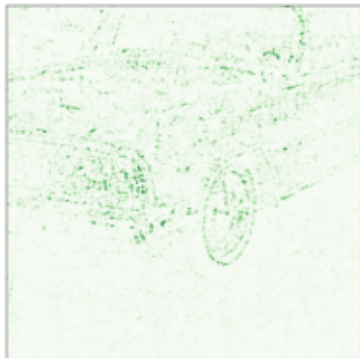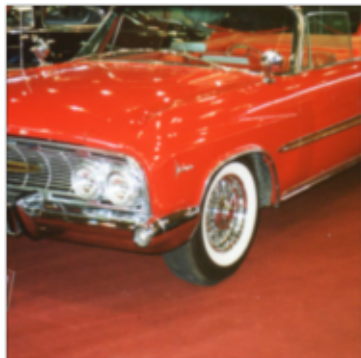

Supplement: Supplementary file 57 [file Xu_Backpropagation_Path_Search_ICCV_2023_supplemental.zip]

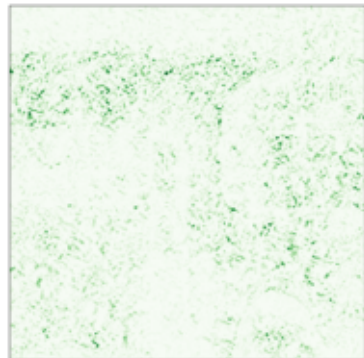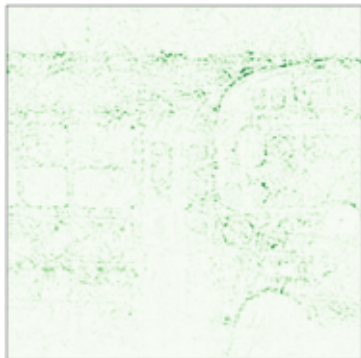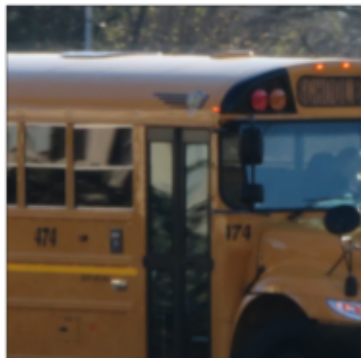

Supplement: Supplementary file 62 [file Xu_Backpropagation_Path_Search_ICCV_2023_supplemental.zip]

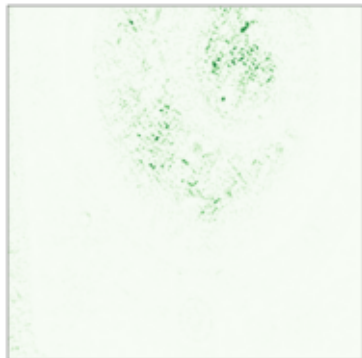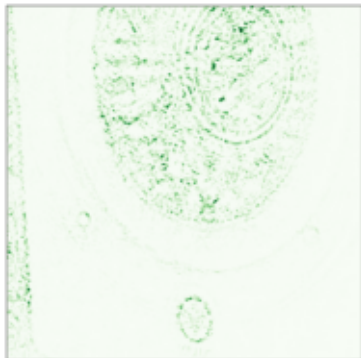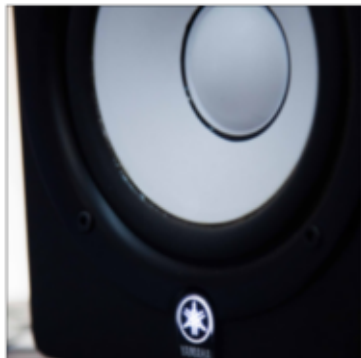

Supplement: Supplementary file 63 [file Xu_Backpropagation_Path_Search_ICCV_2023_supplemental.zip]

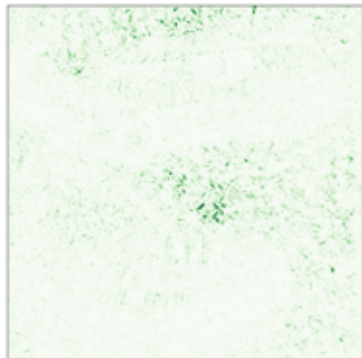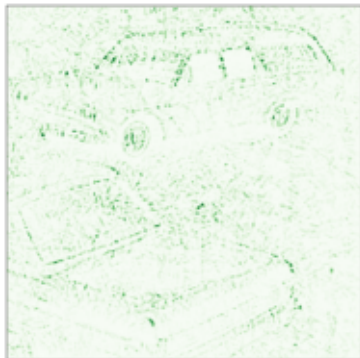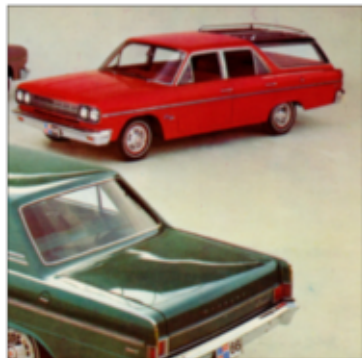

Supplement: Supplementary file 66 [file Xu_Backpropagation_Path_Search_ICCV_2023_supplemental.zip]

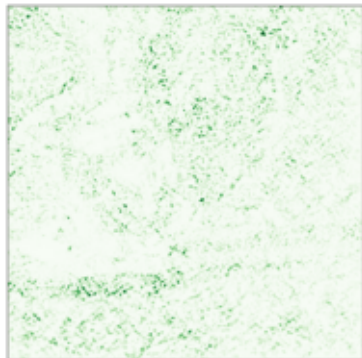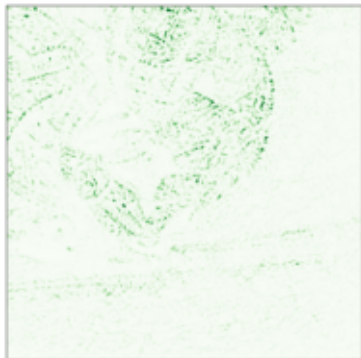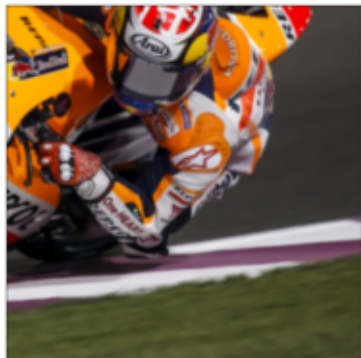

Supplement: Supplementary file 67 [file Xu_Backpropagation_Path_Search_ICCV_2023_supplemental.zip]

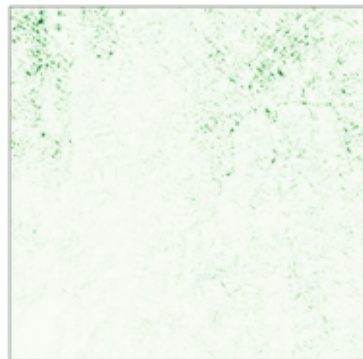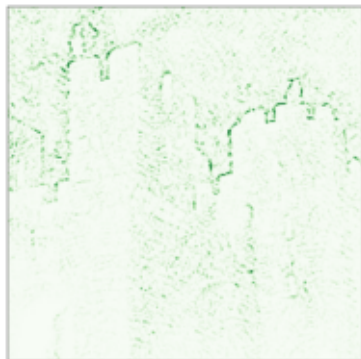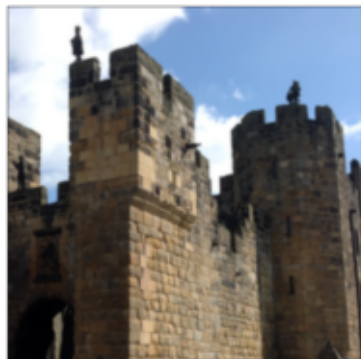

Supplement: Supplementary file 68 [file Xu_Backpropagation_Path_Search_ICCV_2023_supplemental.zip]

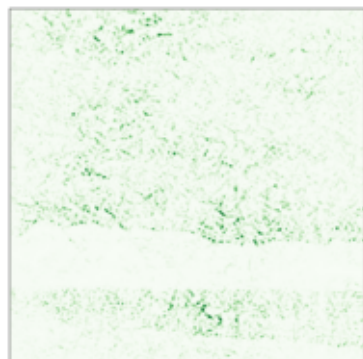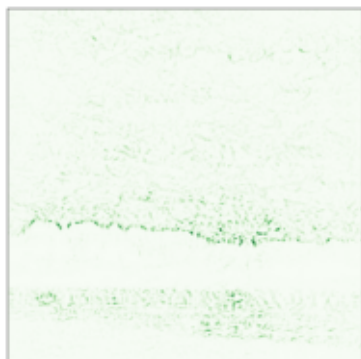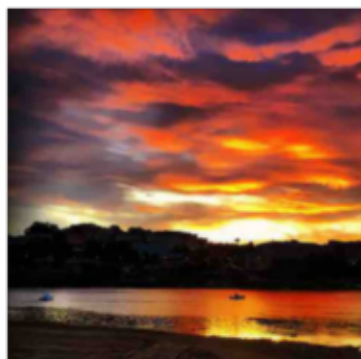

Supplement: Supplementary file 71 [file Xu_Backpropagation_Path_Search_ICCV_2023_supplemental.zip]

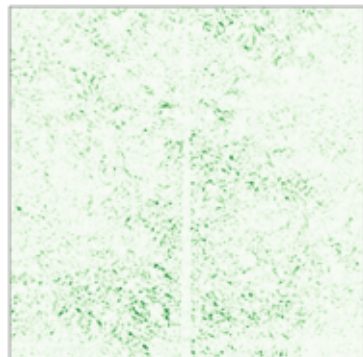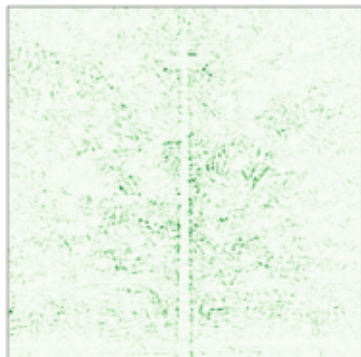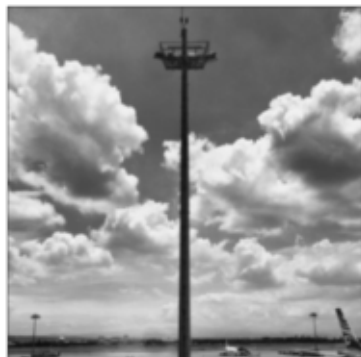

Supplement: Supplementary file 72 [file Xu_Backpropagation_Path_Search_ICCV_2023_supplemental.zip]

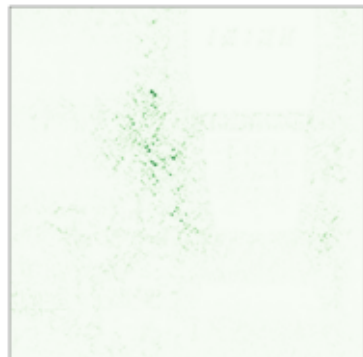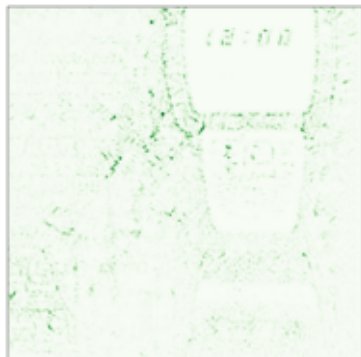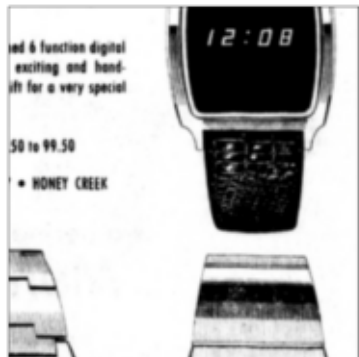

Supplement: Supplementary file 74 [file Xu_Backpropagation_Path_Search_ICCV_2023_supplemental.zip]

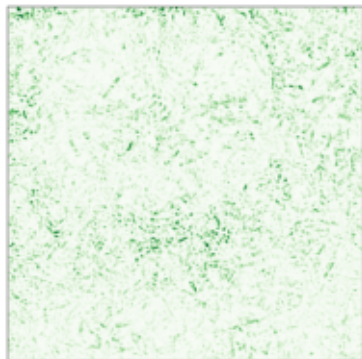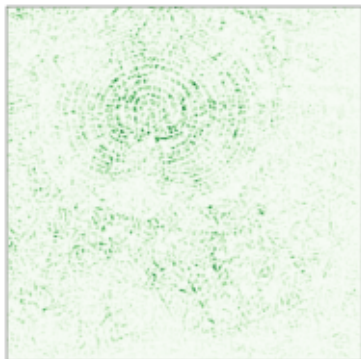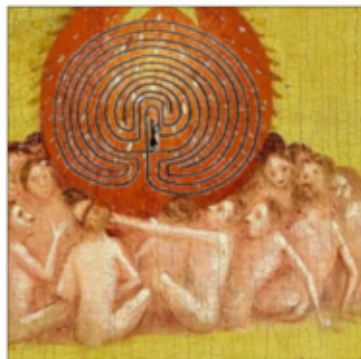

Supplement: Supplementary file 77 [file Xu_Backpropagation_Path_Search_ICCV_2023_supplemental.zip]

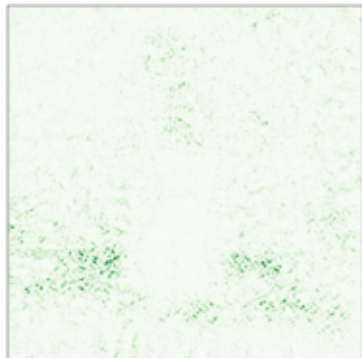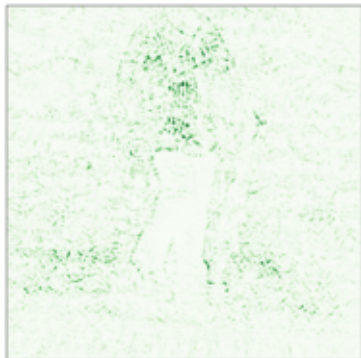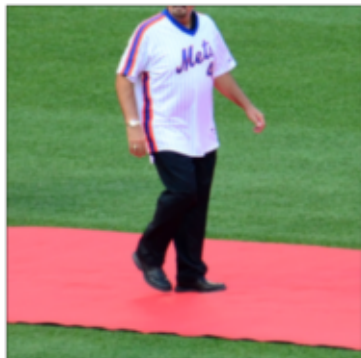

Supplement: Supplementary file 78 [file Xu_Backpropagation_Path_Search_ICCV_2023_supplemental.zip]

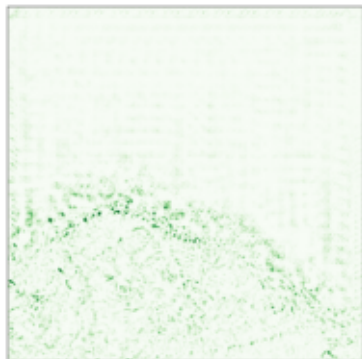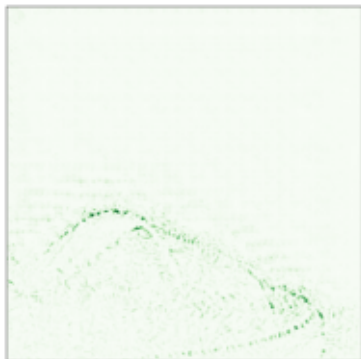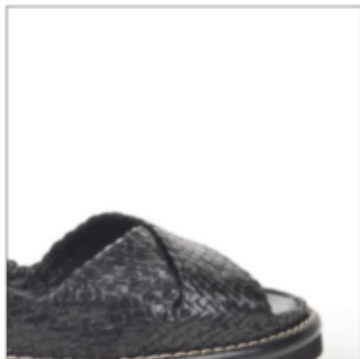

Supplement: Supplementary file 79 [file Xu_Backpropagation_Path_Search_ICCV_2023_supplemental.zip]

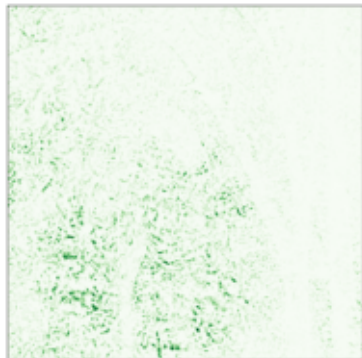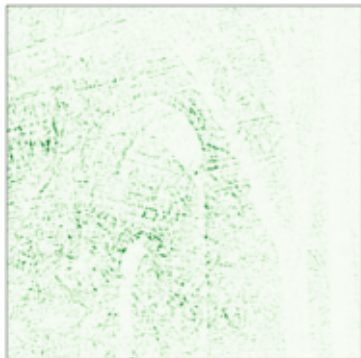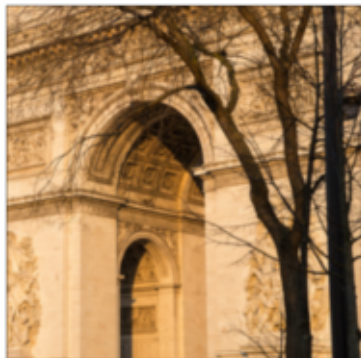

Supplement: Supplementary file 80 [file Xu_Backpropagation_Path_Search_ICCV_2023_supplemental.zip]

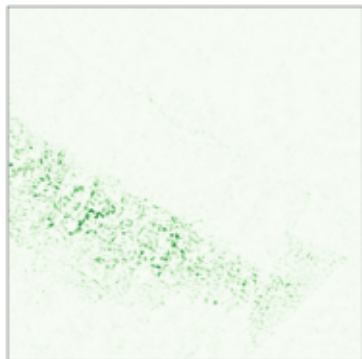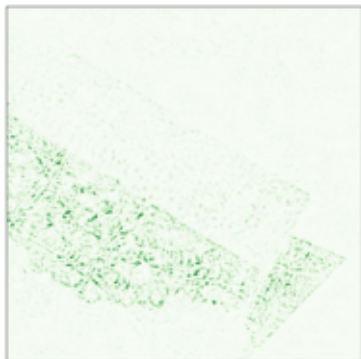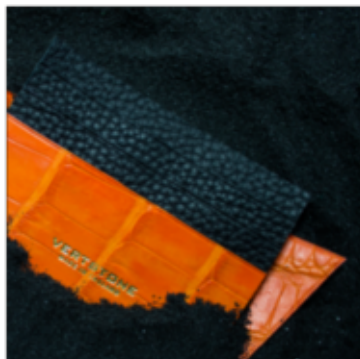

Supplement: Supplementary file 82 [file Xu_Backpropagation_Path_Search_ICCV_2023_supplemental.zip]

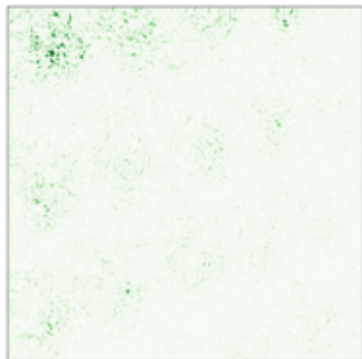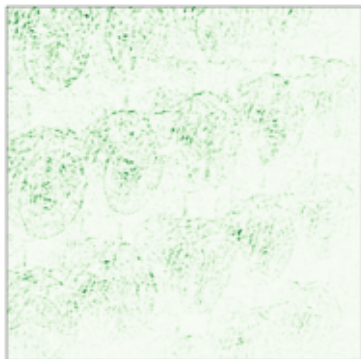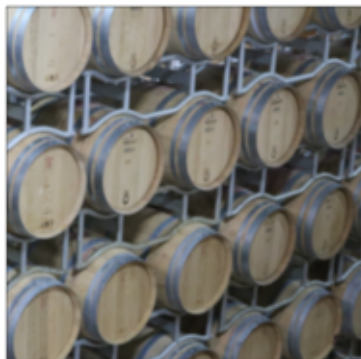

Supplement: Supplementary file 83 [file Xu_Backpropagation_Path_Search_ICCV_2023_supplemental.zip]

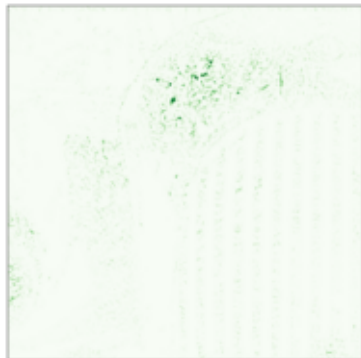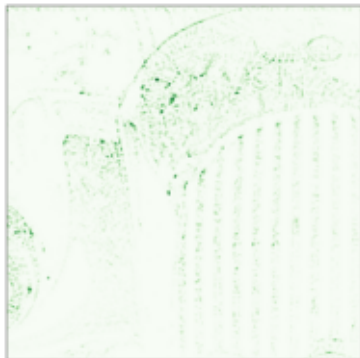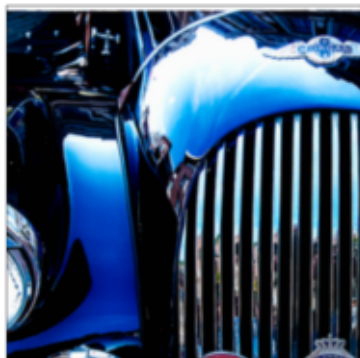

Supplement: Supplementary file 85 [file Xu_Backpropagation_Path_Search_ICCV_2023_supplemental.zip]

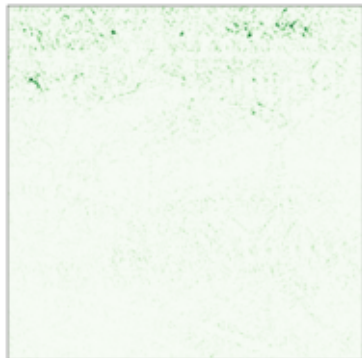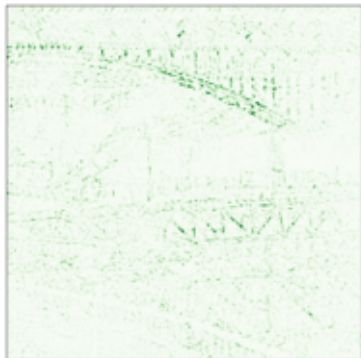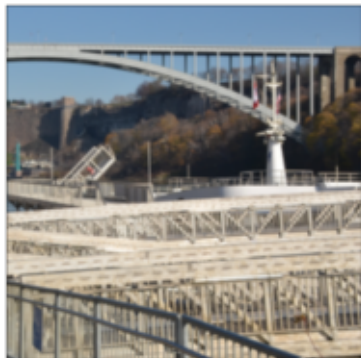

Supplement: Supplementary file 86 [file Xu_Backpropagation_Path_Search_ICCV_2023_supplemental.zip]
